# Supplementary material
Source: ML conference proceedings conference paper supplement (https://aclanthology.org/W19-8644)
Supplement: Supplementary_Attachment [file W19-8644.Supplementary_Attachment.pdf]

## Automatic QE for NLG: Ranting (Joint Rating and Ranking) – Supplementary Material

| Attribute                  | Delexicalisation                                                |
|----------------------------|-----------------------------------------------------------------|
| address                    | full                                                            |
| area                       | names only<br>(excl. <i>city centre</i> ,<br><i>riverside</i> ) |
| customer rating            | -                                                               |
| food/cuisine               | -                                                               |
| kids-friendly              | -                                                               |
| meal type                  | -                                                               |
| nearby venue/monument name | full                                                            |
| phone number               | full                                                            |
| postcode                   | full                                                            |
| price                      | full                                                            |
| price range                | -                                                               |
| venue count                | full                                                            |
| venue name                 | full                                                            |
| venue type                 | -                                                               |

Table 3: List of attributes in our data and their delexicalisation level. Delexicalised attributes are replaced with placeholders (e.g. “X-name” for venue names) to prevent data sparsity (Mairesse et al., 2010; Wen et al., 2015).

| Parameter                        | Value  |
|----------------------------------|--------|
| Embedding/GRU cell width         | 50     |
| Dropout keep rate                | 0.8    |
| Batch size                       | 50     |
| Learning rate                    | 0.0001 |
| Number of fully connected layers | 1      |
| Max. number of epochs            | 100    |
| Epochs using synthetic data      | 50     |

Table 4: Listing of network parameters used for our experiments on both datasets. Only the first two cross-validation folds from the NEM set and only the first 2,500 training instances from the E2E set were used for parameter search on development data.
